# Quantifying the Effect of Anti-cancer Compound (Piperlongumine) on Cancer Cells Using Single-Cell Force Spectroscopy

Nayara Sousa de Alcântara-Contessoto<sup>a,b</sup>, Marinônio Lopes Cornélio<sup>a</sup>,  
Ching-Hwa Kiang<sup>b</sup>

<sup>a</sup>*Departamento de Física, Instituto de Biociências, Letras e Ciências Exatas (IBILCE),  
UNESP, São José do Rio Preto, SP, Brazil*

<sup>b</sup>*Department of Physics & Astronomy, Rice University, Houston, TX, USA*

---

## Abstract

Natural compounds have shown a great potential in anti-cancer research by tumor growth inhibition and anti-metastatic properties. Piperlongumine (PL) is a natural compound derived from pepper species that has been demonstrated to have anti-cancer effect on HeLa cells. Here we focus on understanding the mechanical properties of HeLa cells under PL treatment, using Atomic Force Microscopy (AFM) based single-cell manipulation technique. We used AFM to pull single HeLa cells and acquired the force-distance curves that presented stepwise patterns. We analyzed the step force (SF) and observed that cells treated with PL exhibit higher force compared to control cells. This SF increase was also observed in experiments performed on substrates of different stiffness. Therefore, analyzing SF, it is possible to

---

*Email addresses:* [na.nsalcantara@gmail.com](mailto:na.nsalcantara@gmail.com) (Nayara Sousa de Alcântara-Contessoto), [m.cornelio@unesp.br](mailto:m.cornelio@unesp.br) (Marinônio Lopes Cornélio), [chkiang@rice.edu](mailto:chkiang@rice.edu) (Ching-Hwa Kiang)

investigate the effect of PL on the mechanical properties of the HeLa cells. The understanding of the PL action on HeLa cells' mechanical properties may help in the development of effective therapeutic drugs against cancers.

*Keywords:* Atomic Force Microscopy, AFM, HeLa Cells, Piperlongumine, Piplartine, Cancer Cells, Tether Force, Step Force

---

## 1 **1. Introduction**

2 Anti-cancer research is a challenge and a worldwide interest. Cancer  
3 causes millions of people's death every year, and in 2020, it was responsible  
4 for around 10 million [1, 2]. Cancer diseases have two main concerns: cell  
5 growth and cell migration, which can be uncontrolled [3]. Metastasis, being  
6 the cause for most cancer patients' mortality, receives increasing attention in  
7 both scientific and clinical research [4]. Understanding cancer cell mechanics  
8 can improve the metastasis combat through observations into the diagnosis,  
9 prognosis, and treatment [4, 5]. In this sense, the mechanical properties of  
10 single molecules and single-cells have been investigated using atomic force  
11 microscopy (AFM) and optical tweezers [6, 7, 8, 9, 10, 11].

12 In eukaryotic cells, physical forces can act through the cytoskeleton poly-  
13 mers (actin filaments, microtubules, and intermediate filaments) to control  
14 the mechanical properties, adhesion forces, and cellular behavior [7, 12]. The  
15 cytoskeletal dynamic generates effects on cell motility, division, and overall  
16 mechanical processes [12, 13]. Its dysfunction may result in chromosomal  
17 instability, mitotic arrest, and cell death, becoming common and useful tar-

18 gets to drug design [14]. In particular, AFM can detect a range of forces  
19 from picoNewtons to nanoNewtons, and it has been a powerful tool for high-  
20 resolution imaging and mechanical measurement of single-cell investigations  
21 in near-physiological conditions [15, 13, 6]. AFM technique can also help  
22 understand how cell mechanics are affected by drugs, i.e., providing an alter-  
23 native to evaluate drug-cell interactions [15, 13].

24 Piperlongumine (PL), also known as Piplartine (Figure 1), is a natural  
25 compound that presents several pharmacological properties, such as geno-  
26 toxic, cytotoxic, antimetastatic, and antitumoral [16, 17]. Its target can  
27 be reached through the blood plasma, as observed through *in vitro* and *in*  
28 *vivo* studies [18, 16, 19, 20]. Recently, Meegan et al. presented PL as a  
29 microtubule-destabilizing agent with antiproliferative effects in breast cancer  
30 cells [21]. Additionally, Henrique et al. showed the inhibitory effect of PL  
31 on the  $\alpha$ -tubulin expression in endothelial cells [22]. Microtubule-targeting  
32 agents (MTA) are potent mitotic poisons that inhibit eukaryotic cell prolif-  
33 eration, promote cell death by suppressing microtubule dynamic instability,  
34 and interfere with intracellular transport [5, 23, 24]. PL presents different  
35 mechanisms of action and has been proposed as a potential anti-cancer drug  
36 and an interesting compound to be investigated [16, 25, 26].

37 Studies suggest the cytotoxicity of piperlongumine in a dose-dependence  
38 on HeLa cells [27, 25]. The literature reports the  $EC_{50}$  (concentration in-  
39 hibiting cell growth by 50%) as 2.7 and 7.1  $\mu\text{M}$  [27, 25]. Notwithstanding  
40 the advances in understanding biochemical properties, there is a lack of in-

41 formation regarding the mechanical features and how they can affect cancer  
42 cell stability under the influence of drugs. AFM has been used to investigate  
43 the viscosity, surface, stiffness, adhesive properties of drug effects on cells  
44 [15, 13, 28, 29, 30]. Mechanical force is a nonspecific parameter, i.e., inde-  
45 pendent of the types of molecules, cells, and tissues [8]. Thus, it can be used  
46 to sense the influences of drugs on cells.

47 In this study, we performed mechanical characterization of HeLa cells  
48 in response to PL presence. The analyses were performed at different con-  
49 ditions of HeLa at piperlongumine treatment and their respective controls,  
50 using AFM through single-cell manipulation. We varied the PL concen-  
51 trations, treatment times, and culture substrates (the surface where cells  
52 grow up) with different stiffness. This study provide quantified mechanical  
53 information of the compounds on cells, which can be related to PL's anti-  
54 proliferative effect. Therefore, investigate the cellular mechanical properties  
55 can aid cancer therapeutic and diagnostic research [4].

## 56 **2. Materials and Methods**

### 57 *2.1. Materials and Solutions*

58 Human cervical cancer cells (HeLa; ATCC) were cultured in a medium  
59 containing DMEM (Dulbecco's Modification of Eagle Medium; Corning),  
60 supplemented with 10% FBS (Fetal Bovine Serum; Gibco) and 1% Pen-  
61 Strep (Penicillin/ Streptomycin; Gibco), and incubated at 37°C in a 5%  
62 CO<sub>2</sub> humidified atmosphere. Piperlongumine (C<sub>17</sub>H<sub>19</sub>NO<sub>5</sub>) was donated by

63 collaborators and dissolved in DMSO (Dimethylsulfoxide; ATCC) at final  
64 concentrations of 5, 10, and 15  $\mu\text{M}$  [16, 31]. Polymeric substrates with spe-  
65 cific stiffness (0.5 and 16 kPa) were donated by a collaborator. MLCT-O10  
66 cantilever (Bruker), tipless, was used as a probe in AFM experiments.

## 67 2.2. Cellular Sample Preparation

68 Sterilized steel disks were covered by glass or specific polymeric substrates  
69 (with determined stiffness) and kept in 35mm Petri dishes; the cells ( $10^5$   
70 cells/ml) were subcultured with DMEM supplemented (10%FBS and 1%Pen  
71 Strep) medium on this assay and kept overnight in an incubator (5%  $\text{CO}_2$  and  
72  $37^\circ\text{C}$ ). After this step, the cells were treated by Piperlongumine at different  
73 action times and different concentrations. The equivalent volume of vehicle  
74 DMSO without PL was added to the DMSO control group and no DMSO/PL  
75 to the negative control group. DMSO at less than 0.5% in the cell culture  
76 medium [32].

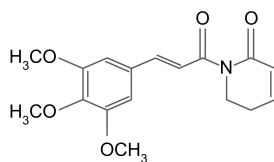

Figure 1: Chemical structure of Piperlongumine (PL), also known as Piplartine, (5,6-dihydro-1- [(2E) -1-oxo-3- (3,4,5-trimethoxyphenyl) -2-propen-1-yl] -2 (1H) -pyridinone) [16, 31].

### 77 *2.3. Atomic Force Microscopy*

78 Force-distance curves were performed using a MultiMode 8 Atomic Force  
79 Microscope (Bruker) equipped with a Nanoscope V controller (Bruker), a  
80 PicoForce (Force Spectroscopy Control Module, Digital Instruments), and  
81 an optical microscope (Digital Instruments). The cantilever (MLCT-O10)  
82 was calibrated, measuring the deflection sensitivity and using the Thermal  
83 Tune to determine the cantilever spring constant [33].

84 The single-cells on specific disks (glass or soft substrates), at room tem-  
85 perature, were analyzed using the cantilever probes with spring constant (K)  
86 approximately equal to 0.01 N/m (shape C triangular).

87 Figure 2 - A presents an AFM framework. The data collected by AFM  
88 contact mode was performed positioning (X-Y axis) the probe (AFM can-  
89 tilever) on a single-cell. The parameters are set up (ramp size, velocities, trig  
90 threshold, delay times, spring constant) according to the experiment's aim  
91 (Table 1). A laser beam is reflected by the AFM cantilever and collected in a  
92 photodetector (photodiode) while the probe is engaged and withdrawn from  
93 the sample (Z-axis).

#### 94 *2.3.1. Force-Distance Curves*

95 Each cycle of the AFM probe is performed by engaging and withdrawing  
96 it from the cell surface. The cycle generates a pair of force-distance curves  
97 (approach and retract). Figure 2 - C presents a usual retracts curve.

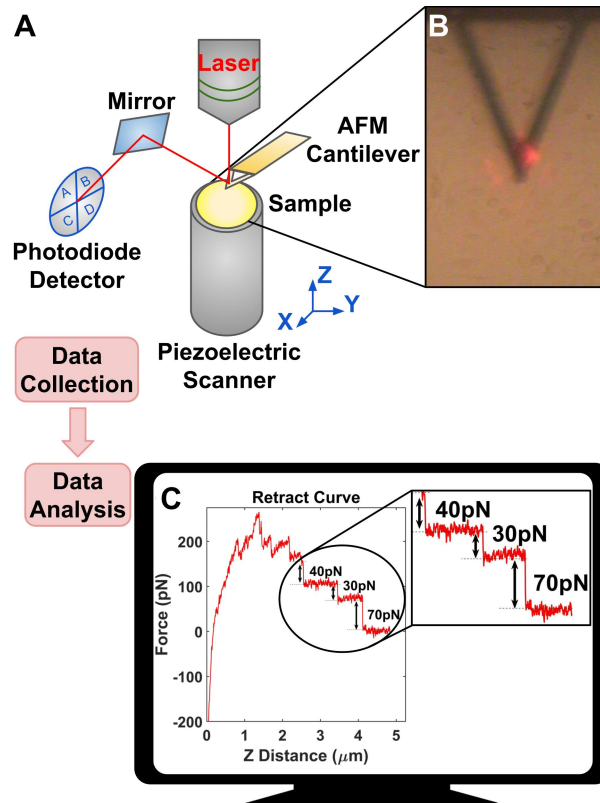

Figure 2: Tether Force, a schematic figure from data collection to data analysis. A - AFM framework. B - Image of the optical microscope attached to AFM: Single-cells selection in the sample. C - The output of Nanoscope software: force-distance curve from AFM cantilever retract move (half cycle) used for analyses of the tether force. The double arrows indicate the tether force (or step force) for each abrupt detaching of retracting curve. Highlighted are the specific values.

98 *2.3.2. Tether Force Studies*

99 Figure 2 - C presents plateaus profile occurring at constant forces, sep-  
100 arated by steps. The multiple-step formation was observed through force-  
101 distance curves generated by an AFM when the probe withdrawal from the  
102 cell surface after its engagement. It is suggested that the pulling process  
103 results in the formation of thin nanotubes or tethers [13]. Then, similar to  
104 springs connected in parallel, multiple tethers can be formed between the  
105 cantilever and the cell [6]. The double arrows in figure 2 - C indicate the  
106 discrete step force (SF or  $\Delta F$ ) between consecutive plateaus, interpreted as  
107 simultaneous elongation and sequential loss of tether [13].

108 The tether force (or Step Force) was obtained by measuring retract curve  
109 steps (Figure 2 - C) from several single-cells. Hundreds of force-distance  
110 curves were recorded for each assay. A step-fitting algorithm was used to  
111 extract the step force values [34].

112 An ensemble of step force values generates distribution graphs (histogram  
113 and violin plots). The histogram is fitted by a Gaussian curve and identifies  
114 the most probable tether force (SF) value. The violin plots were generated to  
115 observe the median value and the quartiles of the data within the distribution.

116 The tether force experiments aim to extract biomechanical information of  
117 HeLa cells in response to PL action in different assays (action time, concen-  
118 tration, and culture substrate dependence). Table 1 shows the AFM setup  
119 parameters for performing the measure.



Table 1: Parameters for analyzes of the tether forces in contact mode AFM, using MLCT-O10 cantilever.

| Ramp Size       | Forward Velocity  | Reverse Velocity  | Trig Threshold | Surface Delay | Retracted Delay | Spring Constant |
|-----------------|-------------------|-------------------|----------------|---------------|-----------------|-----------------|
| 5 $\mu\text{m}$ | 3 $\mu\text{m/s}$ | 3 $\mu\text{m/s}$ | 1 nN           | 3 s           | 3 s             | 0.01 N/m        |

### 120 **3. Results and Discussions**

#### 121 *3.1. Validation Method*

122 The investigated conditions were monitored to guarantee that the signal's  
123 origin is only due to the influence of the compound. Figure 3 - A presents  
124 step force analyzes for cells with DMSO at different times. DMSO presence  
125 did not affect the tether force for HeLa cells, as observed during 30 hours  
126 of the administration. The most probable SF value was kept at around  
127 50pN (Figure 3 - A). Therefore, it is assumed that the medium of compound  
128 solubilization (DMSO) does not interfere in its action.

129 Furthermore, Figure 3 - B presents step force analyzes for the compound  
130 action time. The most probable SF value for HeLa at the first 30 minutes  
131 of piperlongumine action (10 $\mu\text{M}$ , SF  $\approx$  50pN) is equal to the control group  
132 analyses (Figure 3 - A). After 6 hours of piperlongumine treatment (10 $\mu\text{M}$ ,  
133 SF  $\approx$  60pN), the distribution peak shifted to greater step force than the  
134 control group ( $\Delta\text{SF} \approx$  10pN).

135 Bezerra et al. presented several PL's mechanisms of action, such as the  
136 increase of reactive oxygen species (ROS) [16, 25]. Recently, it was observed  
137 a correlation between ROS-free environment and dynamic instability, which  
138 has been related as important in cell division and motility [35, 5, 23]. Micro-

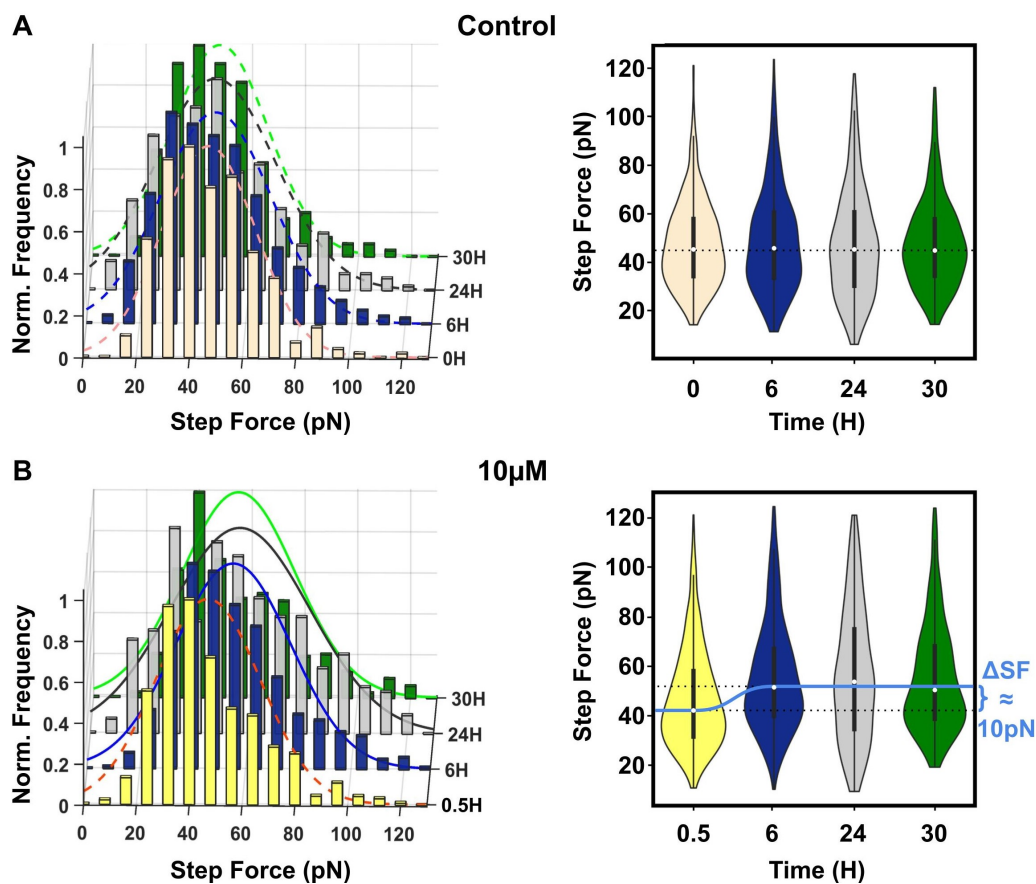

Figure 3: Histograms (left) and violin plots (right) of step force from retract force-distance curves of HeLa cells at time-dependence. A - Control cells (without (0 h) and with DMSO (6, 24, and 30 hours) at  $0\mu M$  of PL). The mean of the histograms is around 50pN (dashed curves). B - Treated cells with PL ( $10\mu M$ ) at 0.5, 6, 24, and 30 hours. The mean of the histograms is around 50pN (dashed curve) and 60pN (continuous curves) for the 0.5 hour and the other analyzed times (6, 24, and 30 hours), respectively. The black bar (right figures) presents the first and third quartile of the data. The white dots (right figures) present the median value for SF.  $\Delta SF$  is the variation of the step force's median value after 6 hours of treatment with PL ( $10\mu M$ ) until the 30 hours observed (the light blue curve is to guide the eyes (Figure 3-B, right)). The cells were cultured on glass substrates. The statistical analyzes are presented in Tables S1 and S2 of Supporting Information.

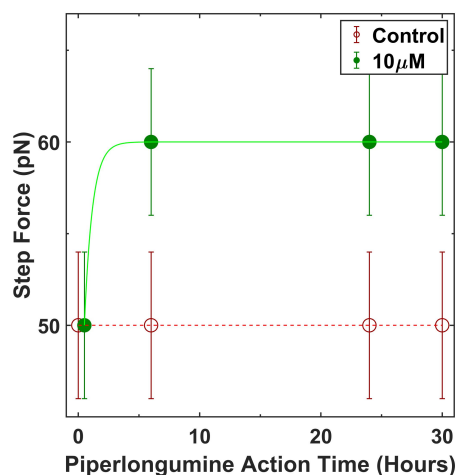

Figure 4: Time-dependent, most probable step force. HeLa cells in the presence of 10  $\mu$ M of PL (30 min, 6, 24, and 30 Hours) and control (0, 6, 24, and 30 Hours). The red and green curves are to guide the eyes.

139 tubules showed an enhanced dynamic instability in a ROS-free environment  
140 [35]. PL has been reported to increase the level of ROS in HeLa cells within  
141 1.5 hours [25]. The increase of ROS level by PL on HeLa cells appears to  
142 be related to suppressing dynamic instability on microtubules, and it can be  
143 associated with the step force variation ( $\Delta$ SF) by PL action time on HeLa  
144 (Figure 3 - B). Figure 4 suggests that the mechanical effect of piperlongumine  
145 on HeLa cells occurs at the first 6 hours of treatment. The time-dependence  
146 results indicate that tether force analyzes on cells are sensitive to drug action  
147 time.

### 148 3.2. Concentration Influences

149 Piperlongumine is reported to be cytotoxic in a concentration dependence  
150 [27, 25]. In this sense, we analyzed the biomechanical effects dependents of

151 the piperlongumine concentration on HeLa cells.

152 Figure 5 presents the step force distributions for HeLa cells treated with  
153 5, 10, and 15 $\mu$ M of piperlongumine, compared with the control (DMSO),  
154 for a constant action time (24 hours). The cells were not sensitive to step  
155 force changes in 5 $\mu$ M of piperlongumine as compared to control, i.e., no  
156 shift at most probable SF was observed for this concentration. However, in  
157 treatment with 10 $\mu$ M and 15 $\mu$ M, the distributions showed a specific increase  
158 of step force value, for each concentration, compared to the control ( $\Delta$ SF  $\approx$   
159 10pN).

160 The biomechanical effects of PL on HeLa cells is sensitive by the tether  
161 force analyzes in a concentration-dependence. These results can be related  
162 to the cellular viability value in 50% for HeLa cells in PL presence, which  
163 are presented in the literature as smaller than 8 $\mu$ M [36, 27, 25].

### 164 3.3. Extracellular Environment Influences

165 Studies reported that the microenvironment of the cell culture influences  
166 the mode and dynamics of cancer cell invasion [3, 6]. Here, it was investigated  
167 the step force of HeLa cells in different substrates of cellular culture with  
168 specific stiffness (0.5kPa, 16kPa, and glass). Figure 6 presents a shift of  
169 distribution peak to larger step force value, from control to piperlongumine  
170 treated cells, for each specific substrate.

171 Figure 6 - E shows the most probable step force for HeLa cells in different  
172 substrates matrices. The SF values at the same condition, either control or

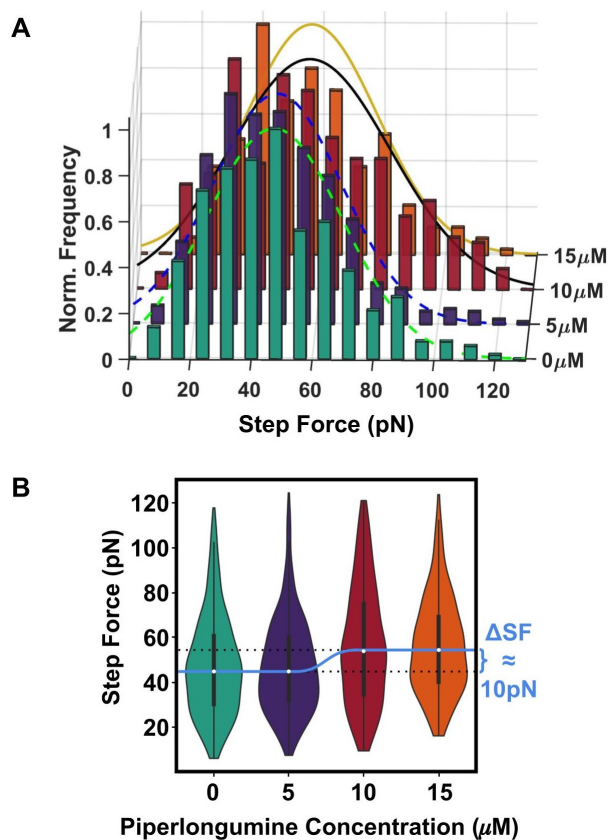

Figure 5: A - Histograms of step force from retract force-distance curves and B - Violin plots of step force of HeLa cells at concentration-dependence (0 (control), 5, 10, and 15 μM) and 24 hours of treatment. The median values (white dots) increase around 10 pN ( $\Delta SF$ , Figure 5-B) between 5 μM and 10 μM. The light blue curve is to guide the eyes, and the black bar presents the first and third quartile of the data (Figure 5-B). The cells were cultured on glass substrates. The statistical analysis is presented in Table S3 of Supporting Information.

173 10 $\mu$ M of piperlongumine, increase with the stiffer substrate (as guided by  
174 the lines in figure 6 - E). These results indicate the extracellular environment  
175 influences the biomechanical effects.

176 Furthermore, for each substrate analyzed, the variation of the most prob-  
177 able SF value between control and treated cells is the same, and around  
178 10pN ( $\Delta SF_{10\mu M-C}$ , Table S5 of Supporting Information). These analyses  
179 indicate that the effect of PL on HeLa cells presents a  $\Delta SF$  pattern that is  
180 independent of the substrate rigidity.

181 The curve in figure 6 - E (Table S6 of Supporting Information) of SF for  
182 different substrates (0.5kPa, 16kPa, and glass) was analyzed using Equation  
183 1 for each sample (Control and treated with 10 $\mu$ M of PL).

$$SF(E_{Substrate}) = SF_{\infty} - \left[ (SF_{\infty} - SF_0) * \exp^{-\frac{E_{Substrate}}{E_{Cell}}} \right] \quad (1)$$

184  $SF_{\infty}$  and  $SF_0$  are the extrapolated step force values (SF) to infinity and  
185 zero, respectively;  $E_{Substrate}$  is the substrate stiffness;  $E_{Cell}$  is the cell stiffness  
186 [6].

187 As presented in the literature, the tether properties depend on actin fil-  
188 aments and microtubules network, which are the major cytoskeleton com-  
189 ponents [9, 13]. Recently, Pontes et al. observed the presence of the actin  
190 filaments in tether structure, besides the membrane [10, 11]. In previous stud-  
191 ies, cells treated with actin microfilaments-destabilizing agent (latrunculin  
192 A (LATA)), as well as glycocalyx backbone-disrupt agent (hyaluronidase),

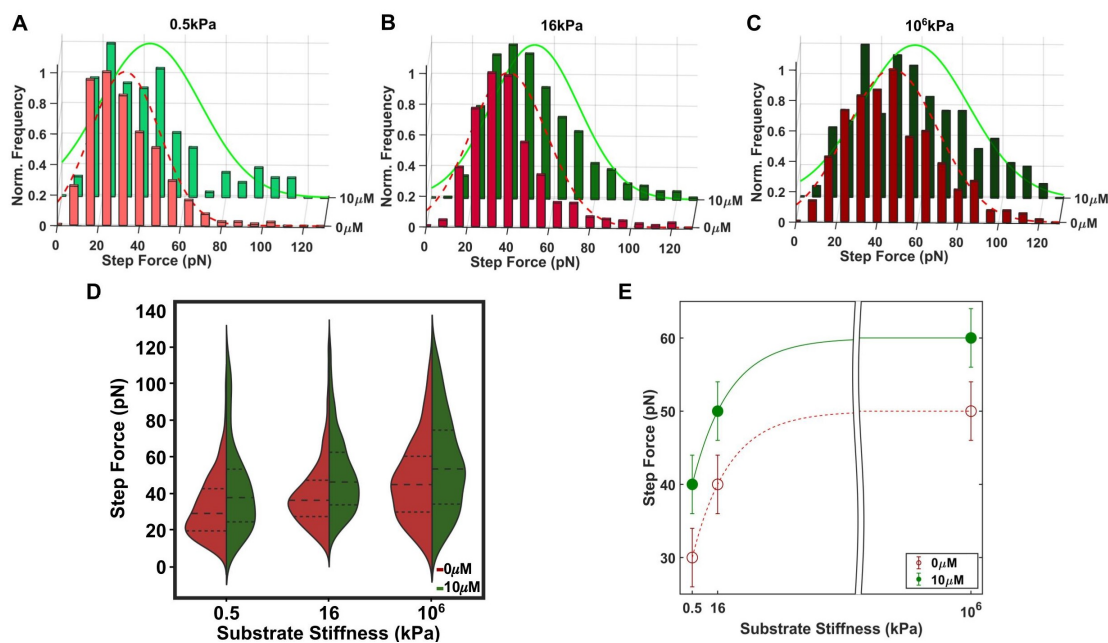

Figure 6: A to C - Histograms of step force from retract force-distance curves and D - Violin plots of the step force for HeLa cells at matrix-dependence (0.5kPa, 16kPa, and 10<sup>6</sup>kPa (glass)) in the presence of PL (10 μM) and control (0 μM of PL) after 24 hours of treatment. The median values (black dashed lines) increase as the matrix (substrate) is stiffer. Besides, the median values increase between control (red half-violin) and 10 μM (green half-violin) in each specific matrix substrate. The black dotted lines present the first and third quartiles of the data. E - The most probable step force (round value) of HeLa cells at matrix-dependence (0.5kPa, 16kPa, and glass) in the presence of PL (10 μM), green curve, and control (dashed red curve) after 24 hours of treatment. The statistical analysis is presented in Table S4 of Supporting Information.

193 trend a decrease of the step force value in the presence of each drug [13]. How-  
194 ever, in this study, HeLa cells treated with PL, a microtubule-destabilizing  
195 agent, presented an increase of the steps (tether) force in several assays (ac-  
196 tion times, drug concentrations, and culture substrates). Due to this different  
197 behavior, we suggest that PL should act in the non-peripheral cellular region  
198 differently from LATA and hyaluronidase. Although both PL and LATA  
199 present cytoskeleton-destabilizing properties, they target different cytoskele-  
200 ton subunits (tubulin and actin, respectively) [13, 21, 37, 38, 5]. Therefore,  
201 this study suggests that tether (step) force can be used as a mechanical  
202 biomarker sensitive to the site of the cellular target by drugs.

#### 203 **4. Conclusion**

204 Understanding the biomechanical properties in cells upon compound in-  
205 teraction can help elucidate the underlying mechanism of anti-cancer drug  
206 activities. In this context, Atomic Force Microscopy (AFM) is a technique  
207 that can aid the studies of drug action mechanisms quantitatively. Here, we  
208 employed AFM experiments to investigate cancer cells' biomechanical prop-  
209 erties under the influences of an anti-cancer compound. Different conditions  
210 of the compound and culture substrate rigidity were explored using HeLa  
211 cells. The results indicated that the step force (SF) is sensitive to the drug  
212 action time; piperlongumine acts on HeLa cells in the first 6 hours of the  
213 treatment. Additionally, SF is sensitive to the compound concentration; be-  
214 tween 5 and 10  $\mu\text{M}$  of piperlongumine treatment, HeLa cells experiments



215 present an increase of SF, a variation of around 10 pN. Besides action time  
216 and the compound concentration, SF is also sensitive to the cytoskeleton  
217 changes; HeLa cells in the presence of 10  $\mu$ M of the piperlongumine in-  
218 crease the tether force ( $\Delta SF_{10\mu M-C} \approx 10\text{pN}$ ) compared with the control,  
219 independently of the substrate stiffness. Recently, piperlongumine has been  
220 described in the literature as a microtubule-destabilizing agent [21]. In this  
221 study, we observed an increase in the step force values of HeLa cell experi-  
222 ments in the presence of the piperlongumine in different assays (action times,  
223 drug concentrations, and culture substrates). Such SF increment suggests  
224 that piperlongumine acts by targeting the microtubule of HeLa cells. The  
225 pipeline of AFM experiments presented here showed an effective procedure  
226 to characterize the overall interactions between anti-cancer drugs and cancer  
227 cell lines.

## 228 **5. Acknowledgments**

229 The authors thank Ian Lian for the polymeric substrates provided, Daniel  
230 Pereira Bezerra and José Maria Barbosa-Filho for piperlongumine provided,  
231 Jingqiang Li for laboratory technical support and Lucas Fugikawa Santos  
232 for the valuable discussions. N.S.A.C. thank Conselho Nacional de Desen-  
233 volvimento Científico e Tecnológico (CNPq), Brazil, (Grant 141714/2017-4  
234 and 163893/2018-7). C.-H.K. and N.S.A.C. thank Welch Foundation, United  
235 States, (C-1632).

236 **References**

- 237 [1] H. Sung, J. Ferlay, R. L. Siegel, M. Laversanne, I. Soerjomataram, A. Je-  
238 mal, F. Bray, Global cancer statistics 2020: GLOBOCAN estimates of  
239 incidence and mortality worldwide for 36 cancers in 185 countries, *CA:*  
240 *A Cancer Journal for Clinicians* (2021).
- 241 [2] J. Ferlay, M. Ervik, F. Lam, M. Colombet, L. Mery, M. Piñeros,  
242 A. Znaor, I. Soerjomataram, F. Bray, Global cancer observatory: Can-  
243 cer today, Lyon, France: International Agency for Research on Cancer  
244 (2020. Available from: <https://gco.iarc.fr/today>, accessed [April 2021]).
- 245 [3] A. G. Clark, D. M. Vignjevic, Modes of cancer cell invasion and the role  
246 of the microenvironment, *Current Opinion in Cell Biology* 36 (2015)  
247 13–22.
- 248 [4] T. A. Martin, L. Ye, A. J. Sanders, J. Lane, W. G. Jiang, *Cancer Inva-*  
249 *sion and Metastasis: Molecular and Cellular Perspective*, Landes Bio-  
250 *science*, 2013.
- 251 [5] E. Pasquier, M. Kavallaris, Microtubules: a dynamic target in cancer  
252 therapy, *IUBMB life* 60 (2008) 165–170.
- 253 [6] J. Li, S. S. Wijeratne, T. E. Nelson, T.-C. Lin, X. He, X. Feng,  
254 N. Nikoloutsos, R. Fang, K. Jiang, I. Lian, C.-H. Kiang, Dependence  
255 of Membrane Tether Strength on Substrate Rigidity Probed by Single-

- 256 Cell Force Spectroscopy, *The Journal of Physical Chemistry Letters* 11  
257 (2020) 4173–4178.
- 258 [7] O. Chaudhuri, S. H. Parekh, W. A. Lam, D. A. Fletcher, Combined  
259 atomic force microscopy and side-view optical imaging for mechanical  
260 studies of cells, *Nature methods* 6 (2009) 383–387.
- 261 [8] C.-L. Guo, N. C. Harris, S. S. Wijeratne, E. W. Frey, C.-H. Kiang,  
262 Multiscale mechanobiology: mechanics at the molecular, cellular, and  
263 tissue levels, *Cell & Bioscience* 3 (2013) 25.
- 264 [9] D. Raucher, M. P. Sheetz, Characteristics of a membrane reservoir  
265 buffering membrane tension., *Biophysical Journal* 77 (1999) 1992–2002.
- 266 [10] B. Pontes, N. Viana, L. Salgado, M. Farina, V. Neto, H. Nussen-  
267 zveig, Cell Cytoskeleton and Tether Extraction, *Biophysical Journal*  
268 101 (2011) 43–52.
- 269 [11] H. M. Nussenzveig, Cell membrane biophysics with optical tweezers,  
270 *European Biophysics Journal* 47 (2018) 499–514.
- 271 [12] D. A. Fletcher, R. D. Mullins, Cell mechanics and the cytoskeleton,  
272 *Nature* 463 (2010) 485–492.
- 273 [13] M. Sun, J. S. Graham, B. Hegedüs, F. Marga, Y. Zhang, G. Forgacs,  
274 M. Grandbois, Multiple Membrane Tethers Probed by Atomic Force  
275 Microscopy, *Biophysical Journal* 89 (2005) 4320–4329.

- 276 [14] C. L. Rieder, H. Maiato, Stuck in Division or Passing through: What  
277 Happens When Cells Cannot Satisfy the Spindle Assembly Checkpoint,  
278 *Developmental Cell* 7 (2004) 637–651.
- 279 [15] X. Yun, M. Tang, Z. Yang, J. J. Wilksch, P. Xiu, H. Gao, F. Zhang,  
280 H. Wang, Interrogation of drug effects on HeLa cells by exploiting new  
281 AFM mechanical biomarkers, *RSC Advances* 7 (2017) 43764–43771.
- 282 [16] D. P. Bezerra, C. Pessoa, M. O. de Moraes, N. Saker-Neto, E. R. Sil-  
283 veira, L. V. Costa-Lotufo, Overview of the therapeutic potential of  
284 pipartine (piperlongumine), *European Journal of Pharmaceutical Sci-*  
285 *ences* 48 (2013) 453–463.
- 286 [17] S. K. Tripathi, B. K. Biswal, Piperlongumine, a potent anticancer phy-  
287 totherapeutic: Perspectives on contemporary status and future possi-  
288 bilities as an anticancer agent, *Pharmacological Research* 156 (2020)  
289 104772.
- 290 [18] D. P. Bezerra, M. C. Vasconcellos, M. S. Machado, I. V. Villela, R. M.  
291 Rosa, D. J. Moura, C. Pessoa, M. O. Moraes, E. R. Silveira, M. A. S.  
292 Lima, N. C. Aquino, J. A. P. Henriques, J. Saffi, L. V. Costa-Lotufo, Pi-  
293 ppartine induces genotoxicity in eukaryotic but not in prokaryotic model  
294 systems, *Mutation Research/Genetic Toxicology and Environmental*  
295 *Mutagenesis* 677 (2009) 8–13.
- 296 [19] D. P. Bezerra, C. Pessoa, M. O. Moraes, L. V. Costa-Lotufo, D. Ru-

- 297 bio Gouvea, V. A. P. Jabor, N. P. Lopes, K. B. Borges, M. A. S.  
298 Lima, E. R. Silveira, Sensitive method for determination of piplartine,  
299 an alkaloid amide from piper species, in rat plasma samples by liquid  
300 chromatography-tandem mass spectrometry, *Química Nova* 35 (2012)  
301 460 – 465.
- 302 [20] N. S. Alcântara-Contessoto, I. P. Caruso, D. P. Bezerra, J. M. B. Filho,  
303 M. L. Cornélio, An investigation into the interaction between piplartine  
304 (piperlongumine) and human serum albumin, *Spectrochimica Acta Part*  
305 *A: Molecular and Biomolecular Spectroscopy* (2019).
- 306 [21] M. J. Meegan, S. Nathwani, B. Twamley, D. M. Zisterer, N. M.  
307 O’Boyle, Piperlongumine (piplartine) and analogues: Antiproliferative  
308 microtubule-destabilising agents, *European Journal of Medicinal Chem-*  
309 *istry* 125 (2017) 453–463.
- 310 [22] T. Henrique, C. d. F. Zanon, A. P. Girol, A. C. B. Stefanini, N. S. d. A.  
311 Contessoto, N. J. F. da Silveira, D. P. Bezerra, E. R. Silveira, J. M.  
312 Barbosa-Filho, M. L. Cornélio, S. M. Oliani, E. H. Tajara, Biological  
313 and physical approaches on the role of piplartine (piperlongumine) in  
314 cancer, *Scientific Reports* 10 (2020) 22283.
- 315 [23] M. O. Steinmetz, A. E. Prota, Microtubule-Targeting Agents: Strategies  
316 To Hijack the Cytoskeleton, *Trends in Cell Biology* 28 (2018) 776–792.
- 317 [24] M. A. Jordan, Mechanism of action of antitumor drugs that interact with

- 318 microtubules and tubulin, *Current Medicinal Chemistry. Anti-Cancer*  
319 *Agents* 2 (2002) 1–17.
- 320 [25] D. J. Adams, M. Dai, G. Pellegrino, B. K. Wagner, A. M. Stern, A. F.  
321 Shamji, S. L. Schreiber, Synthesis, cellular evaluation, and mechanism of  
322 action of piperlongumine analogs, *Proceedings of the National Academy*  
323 *of Sciences of the United States of America* 109 (2012) 15115–15120.
- 324 [26] Y. Wang, J.-W. Wang, X. Xiao, Y. Shan, B. Xue, G. Jiang, Q. He,  
325 J. Chen, H.-G. Xu, R.-X. Zhao, K. D. Werle, R. Cui, J. Liang, Y.-L. Li,  
326 Z.-X. Xu, Piperlongumine induces autophagy by targeting p38 signaling,  
327 *Cell Death & Disease* 4 (2013) e824–e824.
- 328 [27] E. Bosc, J. Nastri, V. Lefort, M. Valli, F. Contiguiba, R. Pioli,  
329 M. Furlan, V. d. S. Bolzani, C. El Amri, M. Reboud-Ravaux, Piper-  
330 longumine and some of its analogs inhibit selectively the human im-  
331 munoproteasome over the constitutive proteasome, *Biochemical and*  
332 *Biophysical Research Communications* 496 (2018) 961–966.
- 333 [28] K. S. Kim, C. H. Cho, E. K. Park, M.-H. Jung, K.-S. Yoon, H.-K.  
334 Park, AFM-Detected Apoptotic Changes in Morphology and Biophys-  
335 ical Property Caused by Paclitaxel in Ishikawa and HeLa Cells, *PLOS*  
336 *ONE* 7 (2012) e30066.
- 337 [29] M. Lekka, D. Gil, K. Pogoda, J. Dulińska-Litewka, R. Jach, J. Gostek,  
338 O. Klymenko, S. Prauzner-Bechcicki, Z. Stachura, J. Wiltowska-Zuber,

- 339 K. Okoń, P. Laidler, Cancer cell detection in tissue sections using AFM,  
340 Archives of Biochemistry and Biophysics 518 (2012) 151–156.
- 341 [30] C. Rotsch, M. Radmacher, Drug-induced changes of cytoskeletal struc-  
342 ture and mechanics in fibroblasts: an atomic force microscopy study.,  
343 Biophysical Journal 78 (2000) 520–535.
- 344 [31] P. M. Boll, J. Hansen, O. Simonsen, N. Thorup, Synthesis and molecular  
345 structure of piplartine (=piperlongumine), Tetrahedron 40 (1984) 171–  
346 175.
- 347 [32] A. B. Trivedi, N. Kitabatake, E. Doi, Toxicity of dimethyl sulfox-  
348 ide as a solvent in bioassay system with HeLa cells evaluated col-  
349 orimetrically with 3-(4,5-dimethylthiazol-2-yl)-2,5-diphenyl-tetrazolium  
350 bromide., Agricultural and Biological Chemistry 54 (1990) 2961–2966.
- 351 [33] J. L. Hutter, J. Bechhoefer, Calibration of atomic-force microscope tips,  
352 Review of Scientific Instruments 64 (1993) 1868–1873.
- 353 [34] J. W. J. Kerssemakers, E. L. Munteanu, L. Laan, T. L. Noetzel, M. E.  
354 Janson, M. Dogterom, Assembly dynamics of microtubules at molecular  
355 resolution, Nature 442 (2006) 709–712.
- 356 [35] M. S. Islam, A. M. R. Kabir, D. Inoue, K. Sada, A. Kakugo, Enhanced  
357 dynamic instability of microtubules in a ROS free inert environment,  
358 Biophysical Chemistry 211 (2016) 1–8.

- 359 [36] L. O. Afolabi, J. Bi, L. Chen, X. Wan, A natural product, Piperlongu-  
360 mine (PL), increases tumor cells sensitivity to NK cell killing, Interna-  
361 tional Immunopharmacology 96 (2021) 107658.
- 362 [37] M. Coué, S. L. Brenner, I. Spector, E. D. Korn, Inhibition of actin  
363 polymerization by latrunculin A, FEBS Letters 213 (1987) 316–318.
- 364 [38] H. Kubitschke, J. Schnauss, K. D. Nnetu, E. Warnt, R. Stange, J. Kaes,  
365 Actin and microtubule networks contribute differently to cell response  
366 for small and large strains, New Journal of Physics 19 (2017) 093003.
